# Supplementary material for: Opportunities for improved surveillance and control of dengue from age-specific case data
Source: eLife journal article supplement (doi:10.7554/elife.45474), 2019-05-23

Crude Incidence per 1000

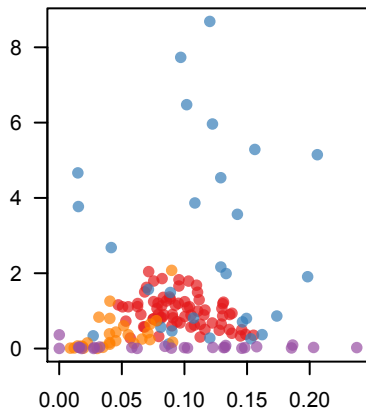

Standardized Incidence per 1000

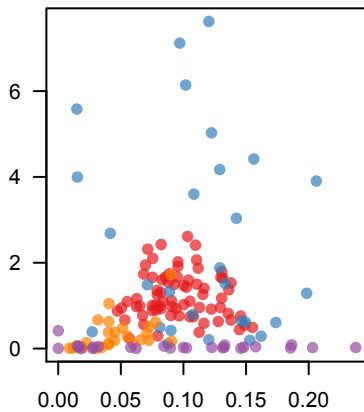

Mean Age

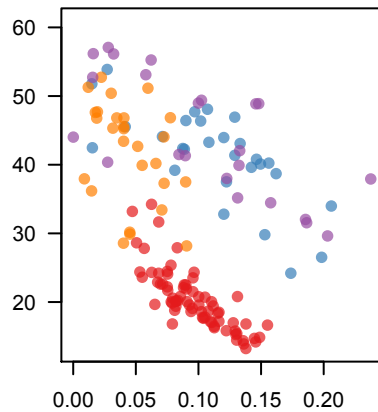

Proportion of incidence under 10 years

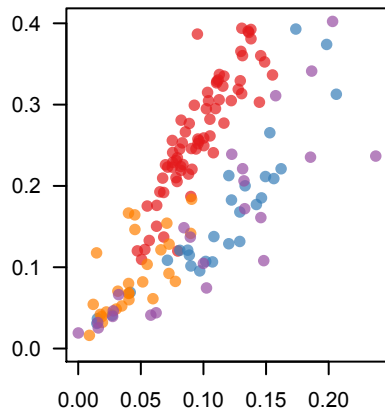

Age at peak incidence

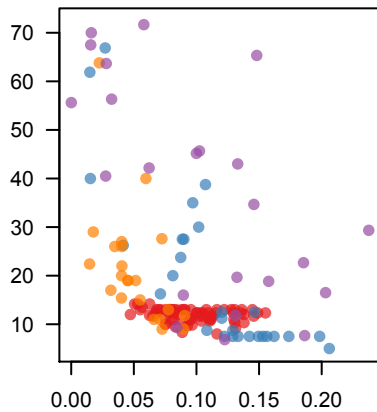

Supplement: supp [file elife-45474-supp-v1.zip]
