# Supplementary figures and images for: Opportunities for improved surveillance and control of dengue from age-specific case data
Source: eLife journal article supplement (doi:10.7554/elife.45474), 2019-05-23

A.

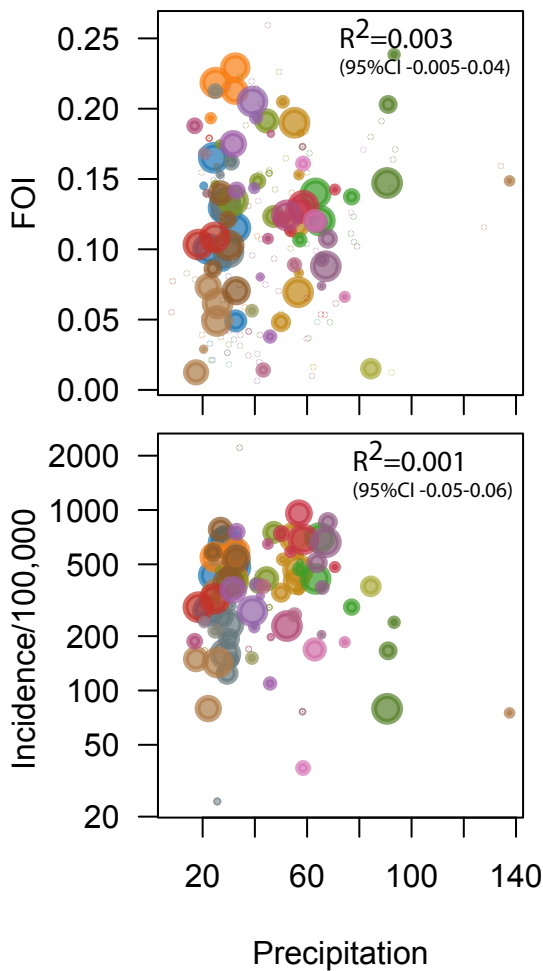

B.

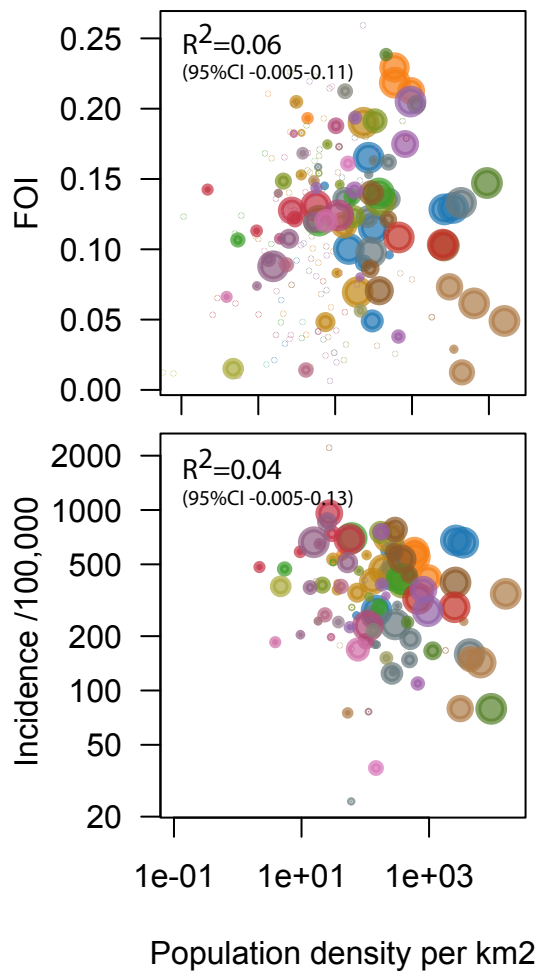

Supplement: supp [file elife-45474-supp-v1.zip]

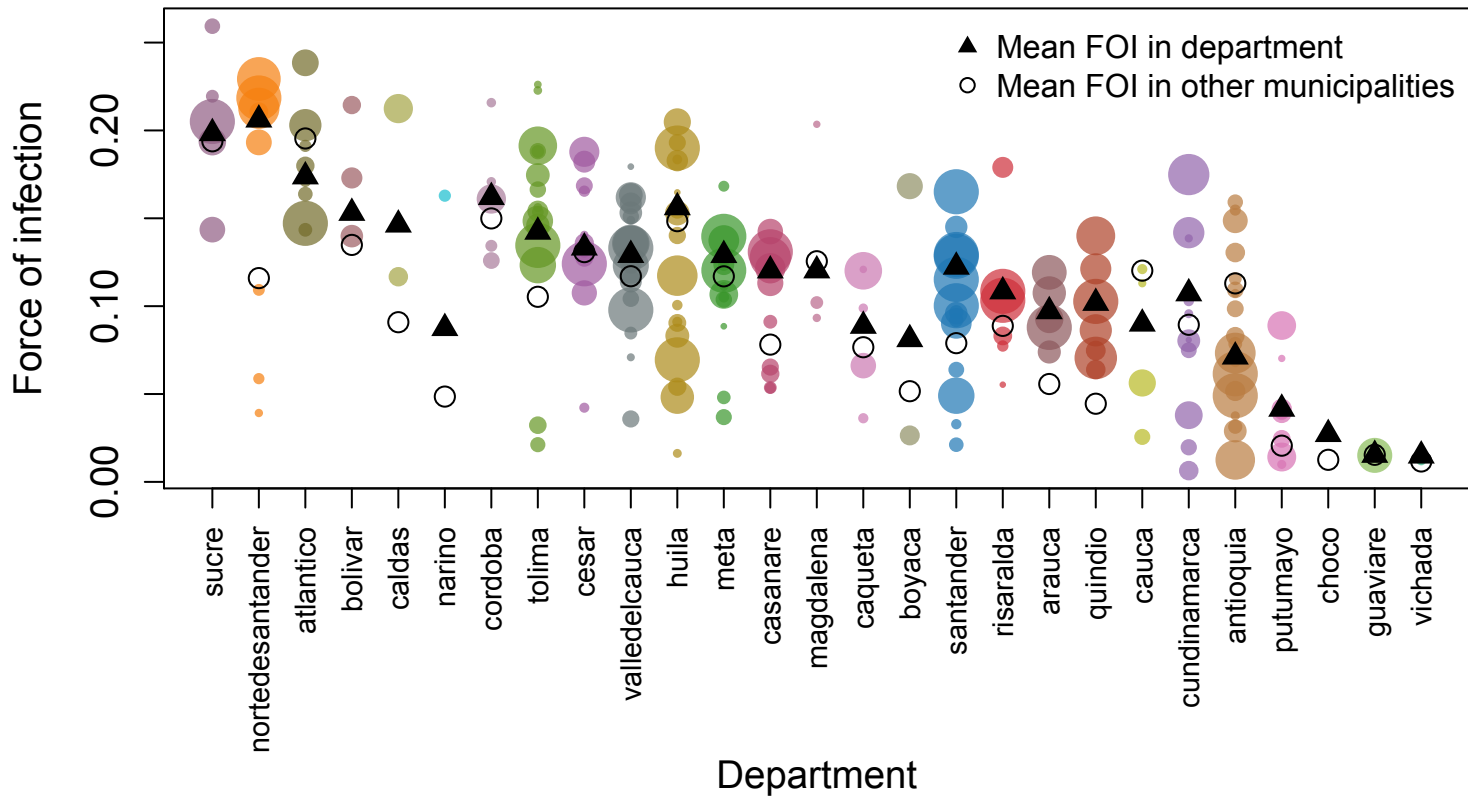

Supplement: supp [file elife-45474-supp-v1.zip]

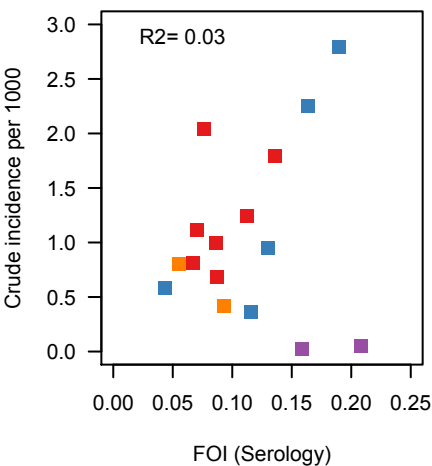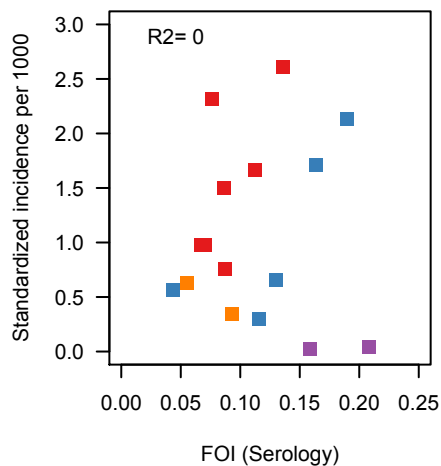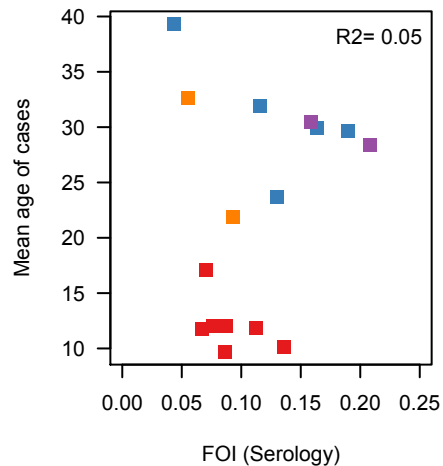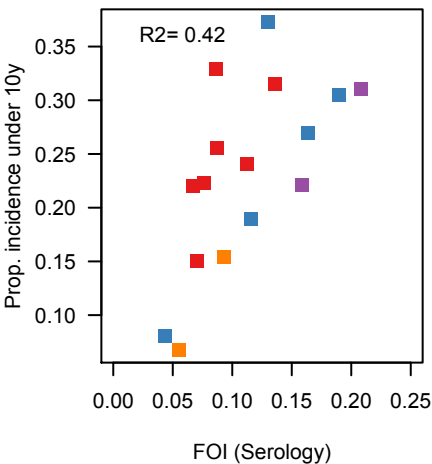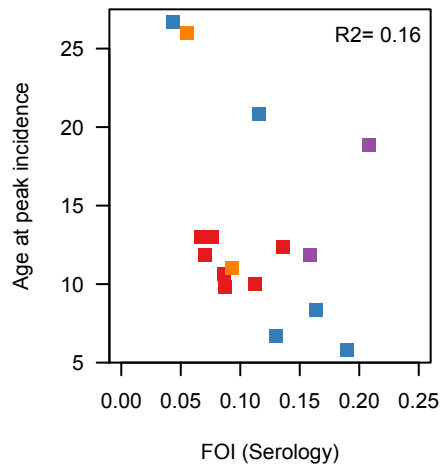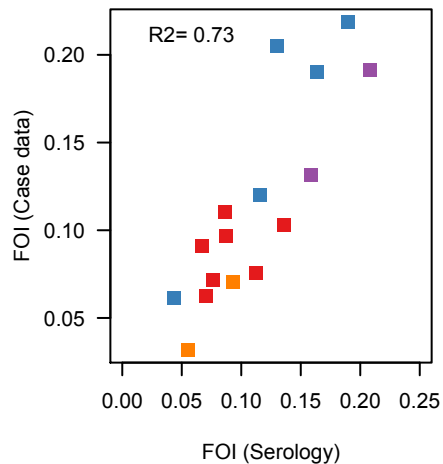

Supplement: supp [file elife-45474-supp-v1.zip]
